# The Shifting Demographic Landscape of Pandemic Influenza

Shweta Bansal<sup>1,2\*</sup>, Babak Pourbohloul<sup>3,4</sup>, Nathaniel Hupert<sup>5,6</sup>, Bryan Grenfell<sup>7,2</sup>, Lauren Ancel Meyers<sup>8,9</sup>

**1** Center for Infectious Disease Dynamics, The Pennsylvania State University, University Park, Pennsylvania, United States of America, **2** Fogarty International Center, National Institutes of Health, Bethesda, Maryland, United States of America, **3** Division of Mathematical Modeling, British Columbia Centre for Disease Control, Vancouver, British Columbia, Canada, **4** School of Population and Public Health, Faculty of Medicine, University of British Columbia, Vancouver, British Columbia, Canada, **5** Department of Public Health, Weill Cornell Medical College, New York, New York, United States of America, **6** Preparedness Modeling Unit, United States Centers for Disease Control and Prevention, Atlanta, Georgia, United States of America, **7** Department of Ecology and Evolutionary Biology, Princeton University, Princeton, New Jersey, United States of America, **8** Section of Integrative Biology, The University of Texas at Austin, Austin, Texas, United States of America, **9** Santa Fe Institute, Santa Fe, New Mexico, United States of America

## Abstract

**Background:** As Pandemic (H1N1) 2009 influenza spreads around the globe, it strikes school-age children more often than adults. Although there is some evidence of pre-existing immunity among older adults, this alone may not explain the significant gap in age-specific infection rates.

**Methods and Findings:** Based on a retrospective analysis of pandemic strains of influenza from the last century, we show that school-age children typically experience the highest attack rates in primarily naive populations, with the burden shifting to adults during the subsequent season. Using a parsimonious network-based mathematical model which incorporates the changing distribution of contacts in the susceptible population, we demonstrate that new pandemic strains of influenza are expected to shift the epidemiological landscape in exactly this way.

**Conclusions:** Our analysis provides a simple demographic explanation for the age bias observed for H1N1/09 attack rates, and suggests that this bias may shift in coming months. These results have significant implications for the allocation of public health resources for H1N1/09 and future influenza pandemics.

**Citation:** Bansal S, Pourbohloul B, Hupert N, Grenfell B, Meyers LA (2010) The Shifting Demographic Landscape of Pandemic Influenza. PLoS ONE 5(2): e9360. doi:10.1371/journal.pone.0009360

**Editor:** Christopher L. Douglas, University of California, United States of America

**Received:** September 30, 2009; **Accepted:** January 21, 2010; **Published:** February 26, 2010

This is an open-access article distributed under the terms of the Creative Commons Public Domain declaration which stipulates that, once placed in the public domain, this work may be freely reproduced, distributed, transmitted, modified, built upon, or otherwise used by anyone for any lawful purpose.

**Funding:** This work was supported by the Research and Policy for Infectious Disease Dynamics (RAPIDD) program of the Science and Technology Directorate, Department of Homeland Security, and the Fogarty International Center, National Institutes of Health (NIH); grants from the James F. McDonnell Foundation, National Science Foundation (DEB-0749097), and NIH Models of Infectious Disease Agent Study (MIDAS) (U01-GM087719-01) to L.A.M.; and support from the Canadian Institutes of Health Research (PTL97125 and PAP93425) and the Michael Smith Foundation for Health Research to B.P. The funders had no role in study design, data collection and analysis, decision to publish, or preparation of the manuscript.

**Competing Interests:** The authors have declared that no competing interests exist.

\* E-mail: shweta@sbansal.com

## Introduction

In March 2009, a new A/H1N1 influenza strain (Pandemic (H1N1) 2009 Influenza or H1N1/09) emerged in humans in Mexico and by early June 2009, the World Health Organization (WHO) had raised the worldwide pandemic alert level to signal a global pandemic of a novel influenza virus. Since the WHO declaration of a pandemic, the new H1N1/09 virus spread across the globe, causing epidemics in most countries [1]. The U.S. Centers for Disease Control and Prevention (CDC) has estimated that there were approximately 55 million infections, 246,000 hospitalizations, and over 11,000 deaths due to H1N1/09 by December 2009 [2]. The 2008–2009 seasonal influenza vaccine was determined to be ineffective against the new strain; however, older individuals who were previously infected by another H1N1 strain circulating prior to 1957 were less likely to develop clinical infection [3,4,5]. Multiple manufacturers have successfully developed monovalent vaccines for H1N1/09, but production delays meant

that widespread vaccination did not occur until late Fall 2009, permitting the virus to spread widely in the Northern Hemisphere.

Influenza is a complex and continually changing disease that infects individuals of all ages. In contrast to diseases like measles and rubella, the dynamics of influenza are strongly influenced by the evolution of immunological properties of the pathogen [6]. The epidemiological landscape of flu is dynamically shaped by cycles of naturally-acquired immunity (through infection) and immune escape (through viral evolution). Based on data from prior influenza pandemics and a simple network-based mathematical model, we argue that, for a newly introduced strain of influenza, this process will cause a shift in the demographic burden of influenza from children to adults. Our analysis also has important implications for the decision making process that sets priorities for both U.S. and global influenza vaccine allocation. We echo our previous conclusions that high-risk groups should receive highest priority and direct protection when vaccine supplies are limited [7]. However, secondary efforts should focus on indirect protection

of groups with greatest potential for infection, whose identities may change over time.

## Methods

### Population Model

Influenza spreads during close contacts between susceptible and infected individuals. The likelihood of a person becoming exposed to disease will strongly depend on the number and intensity of his or her interactions [8,9,10,11,12]. To study the combined impact of complex interaction patterns and infection-induced immunity on the demographic progression of pandemic influenza, we use network models in which individuals are represented as *nodes*, and *edges* connecting nodes represent disease-causing interactions, or *contacts*, which may occur between individuals during an infectious period. The number of edges for a given node is known as the node's *degree*, and the probability distribution of degrees over all nodes is referred to as the *degree distribution*.

Our network model represents an urban area population and is based on data for the city of Vancouver, British Columbia [9]. We model the interaction patterns relevant for the spread of influenza in the population via a data-driven, activity-based contact network model. Each person is assigned an age based on census data from the city of Vancouver, British Columbia, and age-appropriate activities (e.g. school, work, nursing home, etc.) Contacts among individuals reflect household size, employment, school and hospital data also from Vancouver. (More details can be found in [7,9].) School-age children are defined as 5–18 year olds and

adults are assumed to be between 19 and 64 years of age. The emergent age-specific contact patterns of our model closely resemble other empirical estimates (Figure 1), and parsimoniously incorporate individual-level heterogeneity.

### Modeling Immunity and Second Season Dynamics

We assume that an infected node will infect a susceptible contact with a given probability (known as *transmissibility*) that depends on both the infectiousness and susceptibility of the nodes. Once infected, a node cannot be reinfected during the same outbreak and will have resistance to infection during the subsequent season (Figure 2). The cross-immunity in the second season is assumed to be partial and we use  $\alpha$  to represent the loss of immunity from one season to the next ( $\alpha=0$  is full immunity against future infection,  $\alpha=1$  is complete loss of immunity, and intermediate values correspond to partial immunity). For influenza A, natural immunity acquired in one epidemic tends to be heterotypic for the second epidemic appearance of the virus, though several studies have shown that individuals infected by influenza A can be reinfected by antigenically similar strains during the following seasons. An estimated 8% of individuals who were infected in the 1918–1919 Spanish flu pandemic were reinfected in January–February 1920 [13]; and the relative risk for clinical illness during the second wave of the 1918 pandemic after infection in the first wave was estimated to be as low as 6% in U.S. Army personnel camps (but was found to be as high as 51% in one of the camps) [14]. Similar rates of reinfection have been estimated for the 1968 Hong Kong influenza pandemic [15,16]. Generally,

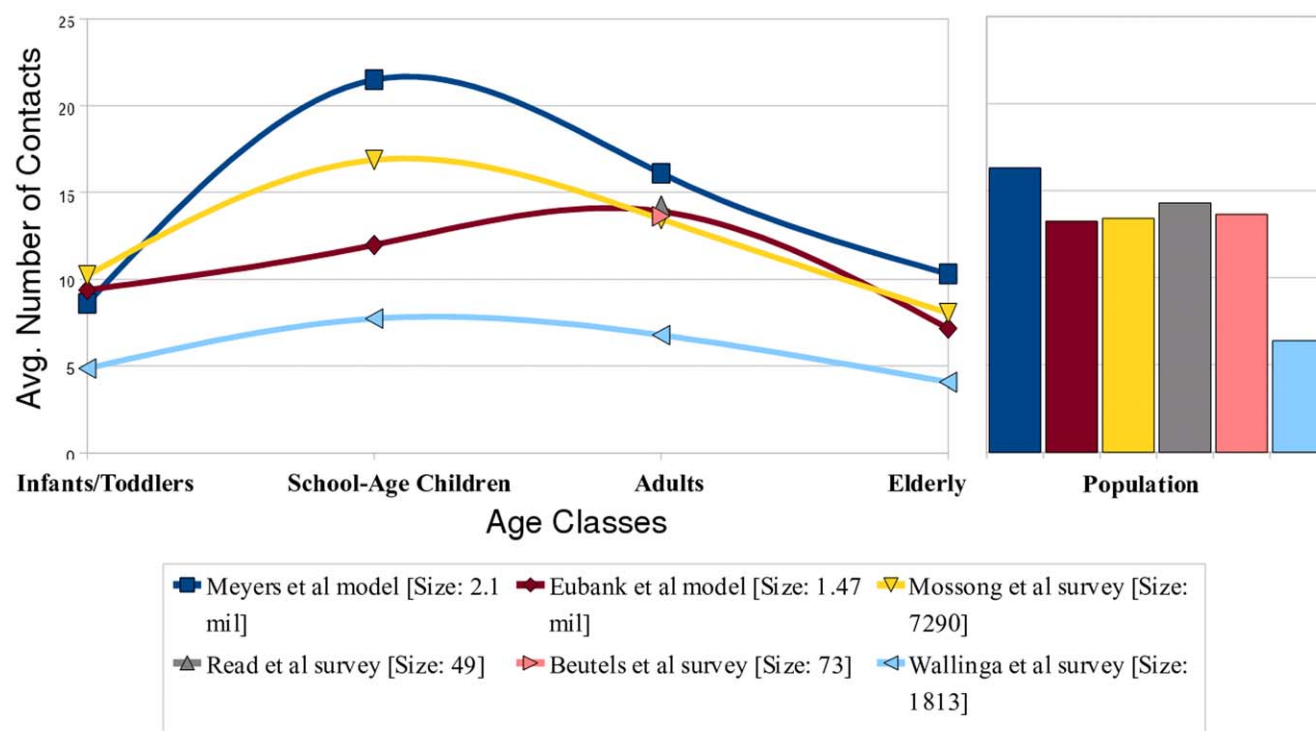

**Figure 1. Estimated age-specific contact rates in an urban population.** We compare six estimates for the mean degree by age of individuals (left panel) and the mean degree across the population (right panel). Meyers et al. [9] and Eubank et al. [44] are model-based estimates in which survey, census and other data were used to construct detailed computer simulations of contact patterns in Vancouver, BC and Portland, OR, respectively. The remaining four sets of estimates [40,41,42,43] are inferred from responses to survey questions about the frequencies of (a) two-way conversations lasting three or more words in the physical presence of another individual, and (b) a physical contacts which involve skin-to-skin contact. The Wallinga study includes only conversational contacts, while the Mossong, Read and Beutels studies include both contact types. The Read and Beutels studies only include adults. Our model (based on [9]) measures contacts during an average infectious period, while the remaining studies measure daily contacts.

doi:10.1371/journal.pone.0009360.g001

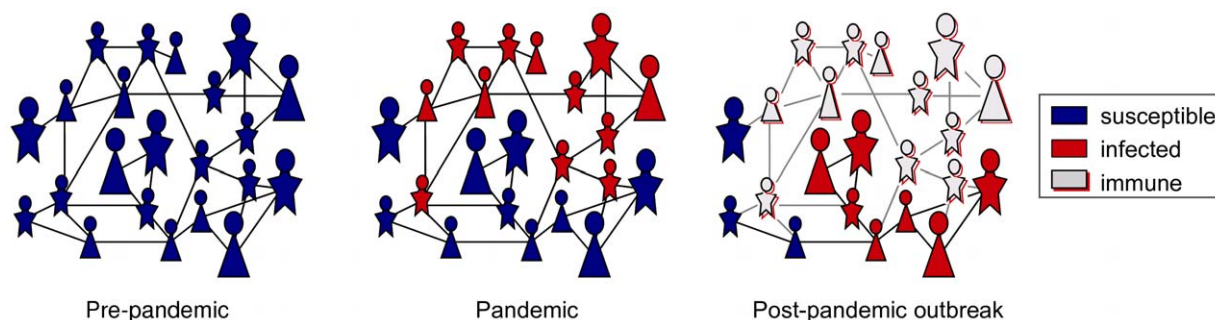

**Figure 2. Changing immunological structure of a population throughout an influenza pandemic.** Lines in these network diagrams indicate contacts through which influenza can spread. Prior to the introduction of a novel pandemic strain, most of the population is susceptible. The pandemic initially sweeps through the most connected portions of the populations, including groups of school-age children, leaving a wake of temporarily immunized individuals. The remaining susceptible population will consist of less connected portions of the population.  
doi:10.1371/journal.pone.0009360.g002

immunity loss for influenza A has been estimated at 5% per year [17], and an estimated 7.4% of previously infected individuals become fully susceptible within one year [18]. Should H1N1/09 produce a second wave of transmission, these studies of prior pandemic strains suggest that  $\alpha$  will likely lie somewhere between 0.05 and 0.10. Following infection, antibodies that recognize influenza surface antigens, hemagglutinin and neuraminidase, persist and are associated with resistance to reinfection [19]. There is evidence that anti-hemagglutinin (HA) antibodies limit reinfection by antigenically similar strains of influenza [20,21] and anti-neuraminidase (NA) antibodies significantly reduce virus replication and release if reinfected [22,23]. Thus, our model assumes that cross-immunity reduces both susceptibility and infectiousness by a factor  $\alpha$ .

Most empirical studies measuring immunity to influenza measure a reduction in infection rate at the population scale. Thus, we model the spread of influenza in a partially immune population assuming perfect partial immunity, using empirical data for infection-acquired immunity to influenza described above. Perfect partial immunity implies that for a level of loss of partial immunity  $\alpha$ , a proportion  $(1-\alpha)$  of the previously infected population is completely protected, while the remaining  $\alpha$  are fully susceptible. (If empirical data on leaky partial immunity for influenza is available, the network-based model described in [24] can be used instead.)

To consider disease dynamics beyond the initial pandemic period, we have developed a mathematical approach based on percolation methods. The standard bond percolation model [25] assumes no pre-existing immunity, thus is an appropriate model for the spread of a novel influenza strain. Using this method to model the spread of influenza in a naive population, we can define a *residual network*, which is the relevant contact network for a subsequent outbreak caused by the same pathogen in the same population. The residual network is made up of individuals who were not infected in the initial epidemic, a proportion  $\alpha$  of whom were infected but have lost immunity since infection and the edges joining them. We describe the residual network via its degree distribution,  $p_{res}(k_r)$ , or the probability that a (susceptible) individual in the residual network has  $k_r$  contacts with other (susceptible) individuals in the residual network (which we derive in Text S1) [24]. Given the transmissibility of the second season pathogen,  $T_2$ , (which may or may not be different than the transmissibility of the first season pathogen), we use bond percolation techniques to predict the consequences of a second season spread of infection. The relationship between transmissibil-

ity ( $T_1$ ) and the reproductive number in a naive population ( $R_0$ ) is described by:

$$R_0 = T_1 \frac{\langle k(k-1) \rangle}{\langle k \rangle} = T_1 \frac{\sum_k k(k-1)p(k)}{\sum_k kp(k)}$$

where  $p(k)$  is the degree distribution in the naive population. Similarly, the effective reproductive number in the partially immune population ( $R_e$ ) is described by

$$R_e = T_2 \frac{\langle k_r(k_r-1) \rangle}{\langle k_r \rangle} = T_2 \frac{\sum_k k(k-1)p_{res}(k)}{\sum_k kp_{res}(k)}$$

An individual will be susceptible to infection in the second season if they were not infected in the first season or if they were infected and have lost immunity (with probability  $\alpha$ ). Thus, the probability that a node of degree  $k$  is susceptible to infection in the second season is equal to:

$$S(k) = (1 - T_1 + T_1 u_1)^k + \alpha \left( 1 - (1 - T_1 + T_1 u_1)^k \right)$$

where,  $T_1$  is the transmissibility of the first season influenza strain and  $u_1$  is a quantity that can be calculated from bond percolation techniques and depends on both the population's contact structure as well as the transmissibility of the pathogen [25]. Also, the probability of infection in the second season to an individual of residual degree  $k_r$  (number of edges in the residual network) can be computed as  $\left( 1 - (1 - T_2 + T_2 u_2)^{k_r} \right)$ , where  $T_2$  is the transmissibility of the second season influenza strain, and  $u_2$  is a quantity that can be calculated from bond percolation techniques. We can combine these two quantities to find the *risk of infection* to a node of (original) degree  $k$  in the second season:

$$R(k) = S(k) \sum_{k_r} p_{res}(k_r|k) \left( 1 - (1 - T_2 + T_2 u_2)^{k_r} \right)$$

where,  $p_{res}(k_r|k)$  is the probability that a node will have residual degree  $k_r$ , given that it has a degree of  $k$  before the first season (and is derived in Text S1) [24]. The values for risk of infection for the second season shown in Figure 3 were calculated using the above formulation, and verified by comparison to stochastic simulations (not shown). Stochastic simulations for this verification

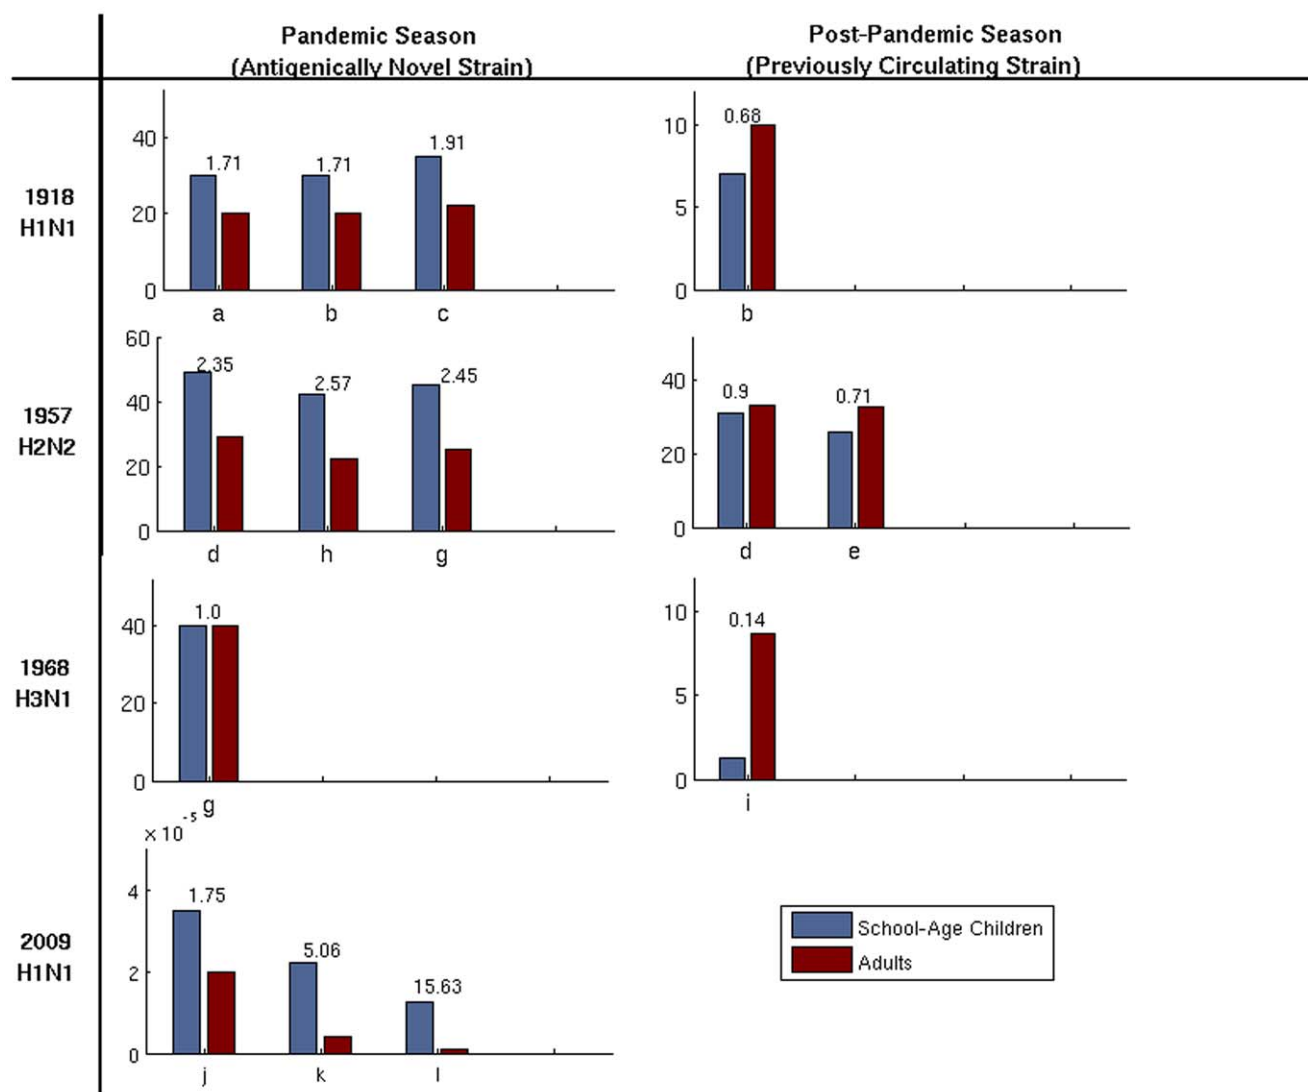

**Figure 3. Attack rates among adults and children during influenza pandemics and subsequent seasons.** Multiple bars for a single strain represent data from different populations. Data are from a: [62], b: [61], c: [66], d: [67], e: [68], f: [69], g: [70], h: [71], i: [72], j: [73], k: [74], l: [38]. Numbers above bars represent odds ratios. While there are consistent qualitative patterns, the estimates are based on diverse data and methodologies and thus should not be compared quantitatively across studies. The 1968 Hong Kong H3N2 pandemic is the only one of the four strains that does not appear to have an initial bias towards children, which may be influenced by cross immunity from prior H2N2 infections as the two viruses shared nearly identical neuraminidase molecules [75]. Data for H1N1/09 is reported as number of confirmed cases as a proportion of age group size in the respective country.

doi:10.1371/journal.pone.0009360.g003

and Figure 3(A) assumed a simple percolation process with  $T_1$  and  $T_2$  as described.

### Vaccination Priorities

In contrast to studies assuming instantaneous pre-exposure vaccination of target groups [26], we model vaccination priorities by randomly selecting individuals within a given priority group (e.g. school-age children) to be vaccinated prior to the start of a second season of the novel strain. We assume a coverage rate of 15% for the entire population, which resembles current H1N1/09 pandemic vaccine uptake [27] and allows for straightforward comparison across different vaccination strategies. We also model cross-immunity from exposure to pre-1957 H1N1 strains of influenza by “pre-immunizing” a randomly chosen subset of adults (9%) and elderly (33%) [5]. Vaccine efficacy for the remaining non-immune population is assumed to be 100% for all

age groups, based on high seasonal influenza vaccine efficacy rates in the target groups of this study (school-age children and adults) [28] and initial evidence for a robust immune response with the monovalent 2009 H1N1 vaccine [29,3].

### Results

#### Evidence for a Fluctuating Landscape

Pandemic influenza is feared for its severe excess mortality [30]. Mortality rates vary significantly, and depend on both viral strain and the age of the person infected. For most seasonal and pandemic flu, the elderly and very young are at highest risk for severe disease; however, the 1918 Spanish flu pandemic is believed to have been deadliest for 20–40 year olds [31]. Influenza morbidity and attack rates also vary among strains and demographic groups. Epidemiological studies and conventional

wisdom suggest that school children have the highest attack rates and ultimately fuel transmission throughout the community [32,33,34,35,36]. Data from the three known influenza emergence events in the twentieth century initially show this bias towards school-aged children (Figure 3). When we look beyond the initial pandemic period, however, the age-specific attack rates reverse, with the probability of infection in adults exceeding that of children.

Data from H1N1/09 outbreaks thus far reveals a similar initial discrepancy in attack rates (Figure 3, [37,38]). There is mounting evidence that cross-immunity from exposure to prior strains may be protecting older adults [5], as has been suggested for infection with the 1918 influenza strain [39]. However, there is a simple and complementary explanation for the differences in attack rates and subsequent age shifts that is based on the heterogeneous contact patterns underlying the spread of influenza.

Several diverse studies have estimated the distribution of contact patterns among age groups, primarily in urban populations [40,41,42,43,44]. Although the studies use different definitions of contact and contact rate, all but one suggest that children have the highest numbers of contacts followed by adults (Figure 1). Basic epidemiological theory suggests that, in the absence of intervention and cross-immunity, children should therefore have the highest attack rates [45,46,9]. As infection-induced immunity accumulates among the highly connected individuals, however, the infection cascades into other parts of the population [47,48,24]. In fact, stochastic simulations of disease transmission illustrate that even within a single influenza outbreak, the burden of disease shifts

from children to adults as disease progresses from the most connected to more moderately connected portions of the population (Figure 4(A)).

Using our mathematical model, we calculate the expected age-specific attack rates in the first and second seasons given the contact structure of the network (its degree distribution), the infectiousness of the strain, and the level of partial immunity from one season to the next. We find that the attack rate shifts shown in Figure 3 are a natural outcome of the contact patterns described in Figure 1. Intuitively, the likelihood of becoming infected during the initial phase of the pandemic increases with number of contacts. However, if the strain makes a second appearance, then the relationship between contact patterns and epidemiological risk is altered by immunity acquired during the initial outbreak (Figure 4(B)). When the population is fully susceptible, the highest-degree nodes are most at risk for infection; and thus are likely to be protected against reinfection. In a partially immune population, while individuals with very few contacts maintain low levels of risk, moderately connected individuals become the most vulnerable subset of the population. This transition is expected to be more pronounced if high levels of immunity are maintained by individuals infected during the initial outbreak (Figure 4(B)), and for strains with higher reproductive numbers (Text S1). These patterns are also expected to occur in populations with different contact and demographic structures (Text S1).

If the reproductive number in the first season is  $R_0 = 1.6$  (as has been estimated for H1N1/09 [37,49]), our model suggests that the returning strain will only invade if it is more transmissible (higher

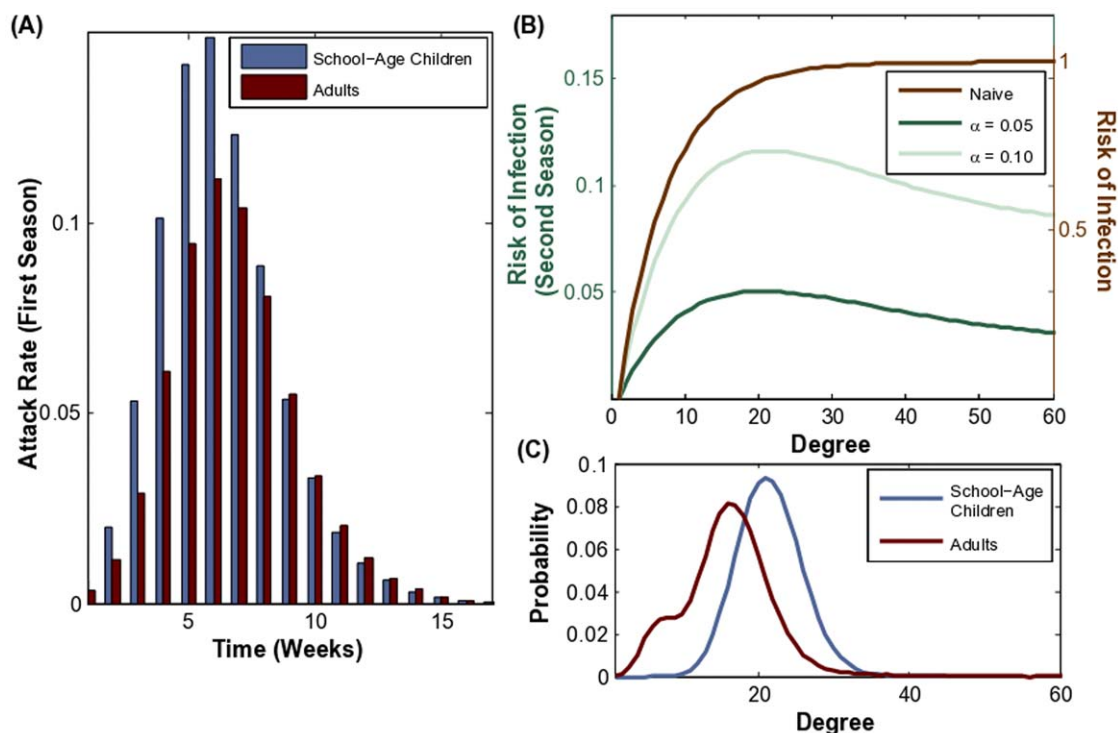

**Figure 4. Individual risk of influenza infection during two sequential outbreaks.** (A) During the initial pandemic season, we notice a shift in the attack rate (the number of new cases during a week in an age group divided by the size of the age group). The attack rate among children is initially higher than the attack rate among adults, but this reverses after the epidemic peak. (B) During the initial pandemic, all individuals are susceptible, and *risk of infection* (defined in Methods) increases with number of contacts (dashed brown line, and right y-axis). During a subsequent outbreak the epidemiological risk landscape shifts towards moderately connected individuals, depending on the level of immunity (green lines, and left y-axis) for  $T_1 = 0.09$  ( $R_0 = 1.6$ ) and  $T_2 = 0.15$  ( $R_e = 1.05, 1.16$ ). (C) The degree distributions for school-age children (mean degree of 21.5) and adults (mean degree of 16.1) in our urban population network model. The bimodal adult degree distribution reflects heterogeneities in adult employment status.

doi:10.1371/journal.pone.0009360.g004

probability of transmission per contact) than the original strain; however, because of a reduced number of contacts among susceptible individuals, its effective reproductive number may be considerably lower than the original strain (Text S1). Higher transmissibility can occur if the pathogen evolves to be more infectious [50,51] or if the social structure changes to enhance transmission, for example, with the commencement of school or relaxation of social distancing measures. Children tend to have higher numbers of contacts than adults (Figure 4(C)) (who combined make up more than 80% of the population in most developed nations). Thus Figure 4 suggests that the burden of disease is expected to shift from school-age children to adults both during the initial pandemic and between the initial pandemic and the subsequent season, which is consistent with the patterns observed during the three influenza pandemics of the twentieth century (Figure 3).

### Implications for Vaccination

The vaccination of school-age children has been suggested as an effective influenza control strategy [52,34,53,54]; and school-age children are among the U.S. CDC's H1N1/09 vaccination priority groups [55]. Since school children are thought to be critical transmitters of flu, immunizing them can break potential chains of transmission before they reach the greater community. This strategy, however, hinges on the primacy of school-age children in influenza transmission and the general idea that the likelihood of catching and spreading flu is proportional to one's number of contacts [56,57,58,7]. However, our study illustrates that naturally-acquired immunity may restructure the population so that the most highly connected individuals are no longer the most vulnerable nor the most likely to transmit infection. Thus the optimal vaccination strategy may depend on the recent epidemiological history of the population. For example, we consider a scenario of 15% overall pandemic vaccination coverage and consider two allocation strategies: (i) vaccinate a random subset of children (who are highly connected) or (ii) vaccinate a random subset of adults (who are moderately connected) (Figure 5). This analysis is meant to explore whether vaccination strategies to minimize transmission should shift as the disease alters the immunological structure the host population; and we do not

explicitly consider other outcome measures such as mortality, years of life lost or economic costs [7,26,59].

Vaccination reduces the size of the epidemic through both direct protection of 15% of the population and indirect protection of others through partial herd immunity. Figure 5(A) shows that during the initial phase of pandemic spread, when the population is fully susceptible, it is more effective to vaccinate children than adults. This prediction reverses for a second season, with adult vaccination more effectively reducing total cases than school-age vaccination. We find this reversal despite the smaller proportion of adults that are covered by vaccination compared with school-age children. We further consider the impact of resistance from exposure to prior strains of the same subtype among older adults (Figure 5(B)). In particular, there are estimates that 9% of adults and 33% of elderly are resistant to H1N1/09 from H1N1 infections prior to 1957 [5]. Even with historical cross-immunity, adult vaccination is expected to be more effective than school-aged vaccination in the second season.

### Discussion

Influenza transmission is constrained by contact patterns, which are influenced by individual behavior and sociological events. For example, the early transmission of H1N1/09 in Mexico City was likely hampered by the closing of schools for the two-week Holy Week period and the subsequent implementation of social distancing interventions including school closures [49]. These events prevented contacts that typically take place within schools that are thought to be pivotal to spread of flu through communities [54,53].

The reverse is also true: the dynamics of infectious diseases can dramatically alter the structure of a host population. Outbreaks of fully immunizing diseases like measles permanently remove cases from the susceptible fraction of the population. Influenza, along with many other partially immunizing diseases such as RSV, pertussis and rotavirus, provides temporary incomplete immunity. Individuals fade in and out of the epidemiological active portion of the population as they become infected and slowly regain susceptibility to future infection. When a novel influenza strain emerges into a pandemic, it works its way through the population, preferentially infecting and thus immunizing individuals with high

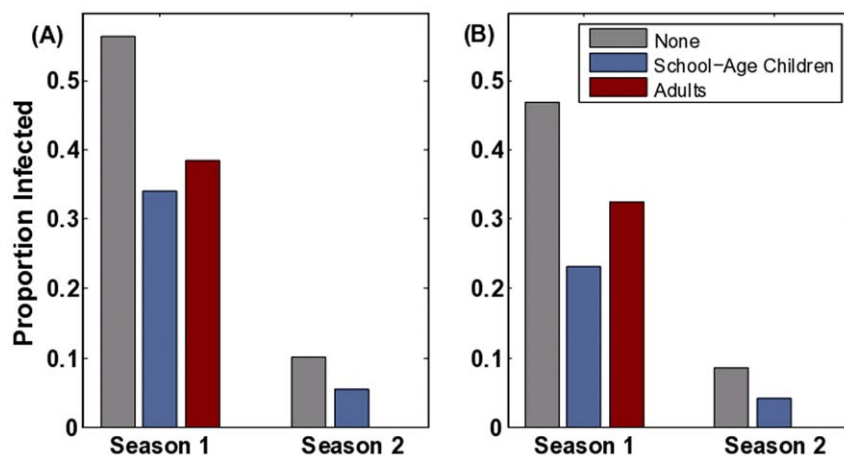

**Figure 5. Comparison of vaccination policies.** (A) The impact of school-aged and adult vaccination priorities at 15% vaccine coverage in a naive ("Season 1") and partially immune population ("Season 2") population at  $\alpha = 0.05$ . (B) The impact of these policies assuming pre-existing resistance among adults (9%) and elderly (33%) acquired through exposure to a strain of the same subtype prior to 1956. The first season pathogen has a reproductive ratio of  $R_0 = 1.6$  ( $T_1 = 0.09$ ) and the second season pathogen has an effective reproductive ratio of  $R_e = 1.05$  ( $T_2 = 0.15$ ). doi:10.1371/journal.pone.0009360.g005

numbers of contacts. It essentially prunes the underlying contact network by removing highly connected individuals and all of their connections. If the strain reemerges in the following season, it faces much sparser chains of susceptible individuals, in which spread is more limited and new groups are expected to bear the brunt of the epidemic. Our simple network-based mathematical model elucidates this phenomenon by both incorporating the heterogeneous distribution of contacts among age groups and tracking the changing immunological structure of the population from one season to the next [12,24].

This model does not consider variability in contact patterns due to seasonality, nor do we account for demographic processes such as births, deaths, and aging. We have found, however, that population aging has minimal impact on network structure or disease dynamics across levels of immunity (Text S1). We also have not addressed the dynamics beyond two seasons and believe that, while the relative risks will continue to change, we cannot simply extrapolate our results to future seasons.

When schools are in session, school children tend to have the highest numbers of contacts among all age groups [40,60]. Consequently, they often form the leading edge of a pandemic [61,62,37]. Adults tend to have lower numbers of contacts and thus lower risk of infection, although they play an important role in spatially dispersing infection [63]. Based on estimated contact patterns, our network model suggests that attack rates for a novel strain of influenza should initially be biased towards children and then shift towards adults. This is consistent with estimated attack rates for the three major pandemics of the 20th century (with the exception of the initial 1968 pandemic season).

This analysis suggests that we might experience a shift in H1N1/09 age-specific infection risks (and thus potential for infecting others) over the next 12 to 24 months, and that the optimal distribution of vaccines and other public health resources may change throughout this period. Early data from the Fall wave of the H1N1/09 outbreak in the United States already shows a trend towards a decrease in cases in school-age children [64]. School-aged children were given the highest priority for the earliest available H1N1/09 vaccines in the U.S. [55]. Although the vaccines are now widely available to all age groups, adherence is quite low [27]. Our results suggest that public health efforts to

increase vaccination rates should perhaps be directed towards adults in the coming months.

Although our study does not explicitly consider the important option of prioritizing groups at high risk for mortality, we echo our previous claim ([7]) that high-risk groups and critical personnel should receive highest priority when vaccine supplies are limited. Secondary efforts should focus on groups with greatest potential for becoming infected and infecting others in order to maximize indirect protection. For seasonal influenza, the high risk age groups (elderly and infants) are distinct from the high transmission age group (school-age children). However, during the second season following a pandemic these priorities may align. In prior pandemics, the highest-risk age groups were young healthy adults (1918) or elderly and infants (1957 and 1968) [65]. Thus, in a partially immune population, prioritizing adults, elderly and infants may not only provide indirect protection by achieving the greatest herd immunity but also directly protect those at risk of complications or death. Our study thus highlights the need for dynamic public health policy—designing priorities that shift along with the epidemiological structure of a population.

## Supporting Information

**Text S1** Supporting methods and analysis.

Found at: doi:10.1371/journal.pone.0009360.s001 (0.42 MB PDF)

## Acknowledgments

The authors thank Joel Mossong, Jonathan Read, and Phillipe Beutels for sharing contact data; and the U.S. Centers for Disease Control and Prevention (CDC) Epidemiology/Surveillance Team for sharing aggregate case count data on the H1N1 outbreak in the United States. (The findings and conclusions in this report are those of the authors and do not necessarily represent the official position of the CDC.)

## Author Contributions

Conceived and designed the experiments: LAM. Analyzed the data: SB. Wrote the paper: SB. Performed modeling and simulation: SB. Edited the manuscript: BP NH BTG LAM.

## References

- Chan M (2009) Influenza A(H1N1): lessons learned and preparedness.
- Centers for Disease Control and Prevention (2009) CDC Estimates of 2009 H1N1 Influenza Cases, Hospitalizations and Deaths in the United States : Accessed Feb 5, 2010.
- Greenberg M, Lai M, Hartel G, Wichems C, Gittleston C (2009) Response to a Monovalent 2009 Influenza A (H1N1) Vaccine. *NEJM* 361(25).
- Garcia-Garcia L, Valdespino-Gomez J, Lazcano-Ponce E, Jimenez-Corona A, Higuera-Iglesias A (2009) Partial protection of seasonal trivalent inactivated vaccine against novel pandemic influenza A/H1N1 2009: case-control study in Mexico City. *BMJ* 339: 3928.
- Centers for Disease Control and Prevention (2009) Serum Cross-Reactive Antibody Response to a Novel Influenza A (H1N1) Virus After Vaccination with Seasonal Influenza Vaccine. *Morb Mortal Wkly Rep* 58: 521–524.
- Smith D, Lapedes A, de Jong J, Bestebroer TM, Rimmelzwaan GF, et al. (2004) Mapping the antigenic and genetic evolution of influenza virus. *Science* 305: 371–6.
- Bansal S, Pourbohloul B, Meyers L (2006) Comparative analysis of influenza vaccination programs. *PLoS Medicine* 3.
- Meyers L, Newman M, Martin M, Schrag S (2003) Applying network theory to epidemics: control measures for mycoplasma pneumoniae outbreaks. *Emerg Infect Dis* 9.
- Meyers L, Pourbohloul B, Newman M, Skowronski D, Brunham R (2005) Network theory and SARS: predicting outbreak diversity. *J Theo Biol* 232: 71–81.
- Keeling M, Eames K (2005) Networks and epidemic models. *J R Soc Interface* 2: 295–307.
- Keeling M (1999) The effects of local spatial structure on epidemiological invasions. *Proc R Soc B* 266: 859–867.
- Bansal S, Grenfell B, Meyers L (2007) When Individual Behavior Matters: Homogeneous and Network Models in Epidemiology. *J R Soc Interface* 4(16): 879–91.
- Jordan E (1927) *Epidemic Influenza: A survey*. Chicago: American Medical Association.
- Barry J, Viboud C, Simonsen L (2008) Cross-protection between successive waves of the 1918–1919 influenza pandemic: epidemiological evidence from US Army camps and from Britain. *J Infect Dis* 198: 1427–34.
- Foy H, Cooney M, Allan I (1976) Longitudinal studies of type a and b influenza among Seattle schoolchildren and families. *J Infect Dis* 134: 362.
- Noble G, Wulff H, Tegtmeyer G, Clark P, Bender T, et al. (1974) Hong kong influenza. *Am J Epidemiol* 100: 517.
- Pease C (1987) An evolutionary epidemiological mechanism, with applications to type a influenza. *Theoretical Population Biology* 31: 422–452.
- Finkenstadt B, Morton A, Rand D (2005) Modelling antigenic drift in weekly flu incidence. *Am Stat* 24: 3447–61.
- Couch R, Kasel J (1983) Immunity to influenza in man. *Annu Rev Microbiol* 37: 529–549.
- Glezen W, Couch R (1997) *Viral Infections of Humans*, Springer, chapter Influenza Viruses. pp 473–505.
- Shulman J (1970) Effects of immunity on transmission of influenza: Experimental studies. *Progr Med Virol* 12: 128–16.
- Murphy B, Kasel J, Chanock R (1972) Association of serum anti-neuraminidase antibody with resistance to influenza in man. *NEJM* 286: 1329–1332.
- Couch R, Kasel J, Gerin J, Schulman J, Kilbourne E (1974) Induction of partial immunity to influenza by a neuraminidase-specific vaccine. *Journal of Infectious Diseases* 129: 411–20.

24. Bansal S, Meyers L (2009) The impact of past epidemics on future disease dynamics. *arxiv* 0910.2008.
25. Newman M (2002) Spread of epidemic disease on networks. *Phys Rev E* 66.
26. Medlock J, Galvani A (2009) Optimizing influenza vaccine distribution. *Science*: 1175570.
27. Centers for Disease Control and Prevention (2009) 2009 H1N1 Flu In The News. Accessed Dec 22, 2009.
28. Nichol K (2003) The efficacy, effectiveness and cost-effectiveness of inactivated influenza virus vaccines. *Vaccine* 21: 1769–1775.
29. Fiore A, Neuzil K (2010) 2009 Influenza A(H1N1) Monovalent Vaccines for Children. *JAMA* 303(1): 73–74.
30. Luk J, Gross P, Thompson W (2001) Observations on mortality during the 1918 influenza pandemic. *Clin Infect Dis* 33: 1375–1378.
31. Daurer C, Serfling R (1961) Mortality from influenza, 1957–1958 and 1959–1960. *Am Rev Respir Dis* 83: 15–26.
32. Glezen W (1996) Emerging infections: pandemic influenza. *Epidemiol Rev* 181: 64–76.
33. Longini I, Koopman J, Monto A, Fox J (1982) Estimating household and community transmission parameters of influenza. *Am J Epidemiol* 115: 736–751.
34. Longini I, Halloran M (2005) Strategy for distribution of influenza vaccine to high-risk groups and children. *Am J Epidemiol* 161: 303–306.
35. Taber L, Paredes A, Glezen W, Couch R (1982) Infection with influenza a/ victoria virus in houston families. *J Hyg Lond* 86: 303–313.
36. Monto A, Kioumehri F (1975) The tecumseh study of respiratory illness. ix. occurrence of influenza in the community, 1966–1971. *Am J Epidemiol* 102: 553–63.
37. Fraser C, Donnelly CA, Cauchemez S, Hanage WP, Kerkhove MDV, et al. (2009) Pandemic Potential of a Strain of Influenza A (H1N1): Early Findings. *Science* 324: 1557–1561.
38. Nishiura H, Castillo-Chavez C, Safan M, Chowell G (2009) Transmission potential of the new influenza A(H1N1) virus and its age-specificity in Japan. *Eurosurveillance* 14: 22.
39. Itoh Y, Shinya K, Kiso M, Watanabe T, Sakoda Y, et al. (2009) In vitro and in vivo characterization of new swine-origin H1N1 influenza viruses. *Nature*; doi:10.1038/nature08260.
40. Mossong J, Hens N, Jit M, Beutels P, Auranen K (2008) Social contacts and mixing patterns relevant to the spread of infectious diseases. *PLoS Medicine* 5: 3.
41. Read J, Eames K, Edmunds W (2008) Dynamic social networks and the implications for the spread of infectious disease. *J R Soc Interface* 5(26): 1001–1007.
42. Beutels P, Shkedy Z, Aerts M, Van Damme P (2006) Social mixing pattern of transmission models of close contact infections. *Epidemiol Infect* 134: 1158–1166.
43. Wallinga J, Teunis P, Kretzschmar M (2006) Using data on social contacts of estimate age-specific transmission parameters for respiratory-spread pathogens. *Am J Epidemiol* 164: 936–44.
44. Eubank S (2008) Synthetic data products for societal infrastructures and protopopulations: Data set 2.0. Technical Report NDSSL-TR-07-003, Network Dynamics and Simulation Science Laboratory, Virginia Polytechnic Institute and State University.
45. Anderson R, May R (1991) Infectious diseases of humans. London: Oxford University Press.
46. Barbour A, Mollison D (1990) Stochastic Processes in Epidemic Theory, Springer, chapter Epidemics and random graphs. pp 86–89.
47. Barthelemy M, Barrat A, Pastor-Satorras R, Vespignani A (2004) Velocity and hierarchical spread of epidemic outbreaks in scale-free networks. *Phys Rev Lett* 92.
48. Ferrari M, Bansal S, Meyers L, Bjornstad O (2006) Network frailty and the geometry of herd immunity. *Proc of R Soc* 273: 2743–2748.
49. Pourbohloul B, Ahued A, Davoudi B, Meza R, Meyers L, et al. (2009) Initial human transmission dynamics of the pandemic (H1N1) 2009 virus in North America. *Influenza and Other Respiratory Viruses* 3(5): 215–22.
50. Taubenberger J, Morens D (1996) 1918 influenza: the mother of all pandemics. *Emerg Infect Dis* 12(1): 15–22.
51. Nguyen-Van-Tam J, Hampson A (2003) The epidemiology and clinical impact of pandemic influenza. *Vaccine* 21: 1762–1768.
52. Longini IJ, Halloran M, Nizam A, Yang Y (2004) Containing pandemic influenza with antiviral agents. *Am J Epidemiol* 159: 623–633.
53. Reichart T, Sugaya N, Fedson D, Glezen W, Simonsen L (2001) The Japanese experience with vaccinating school-children against influenza. *N Engl J Med* 344: 889–896.
54. Monto A, Koopman J, Longini IJ (1985) The tecumseh study of illness. xiii. influenza infection and disease. *Am J Epidemiol* 121: 811–822.
55. Advisory Committee on Immunization Practices, CDC (2009) Novel H1N1 Vaccination Recommendations : Accessed August 5.
56. Pastor-Satorras R, Vespignani A (2001) Immunization of complex networks. *Phys Rev E* 65: 036104.
57. Dezsó Z, Barabási AL (2001) Halting viruses in scale-free networks. *Phys Rev E* 65: 055103.
58. Woolhouse M, Dye C, Etard J, Smith T, Charlwood J (1997) Heterogeneities in the transmission of infectious agents: implications for the design of control programs. *PNAS* 94: 338–342.
59. Meltzer M, Cox N, Fukuda K (1999) The economic impact of pandemic influenza in the United States: Priorities for intervention. *Emerg Infect Dis* 5: 659–71.
60. Wallinga J, Edmunds W, Kretzschmar M (1999) Perspective: human contact patterns and the spread of airborne infectious diseases. *Trends Microbiol* 7: 372–377.
61. Collins S (1957) Influenza in the United States, 1887–1956. Public Health Monograph 48.
62. Frost W (1920) Statistics of influenza morbidity: with special reference to certain factors in case incidence. *Public Health Reports* 36: 584–597.
63. Viboud C, Bjornstad O, Smith D, Simonsen L, Miller M, et al. (2006) Synchrony, waves, and spatial hierarchies in the spread of influenza. *Science* 312: 447–51.
64. Centers for Disease Control and Prevention (2009) Flu view: 2009–2010 influenza season week 48 ending december 5, 2009.
65. Simonsen L, Clarke M, Schonberger L, Adren N, Cox N, et al. (1998) Pandemic versus epidemic influenza mortality: a pattern of changing age distribution. *J Infect Dis* 178: 53–60.
66. Collins S (1931) Age and sex incidence of influenza and pneumonia morbidity and mortality in the epidemic of 1928–1929 with comparative data for the epidemic of 1918–1919. *Public Health Reports* 46: 1909–36.
67. Gilbert V, Caraway C, Bruce J, Mogabgab W (1962) Epidemic recurrence of Asian influenza in Louisiana, 1959–1960. *Am J Public Health* 52: 1432–43.
68. Denniston G (1962) “Influenza surveillance”. Technical Report 70, Communicable Disease Center.
69. Perrott G, Linder F (1958) Data on acute upper respiratory diseases. *Public Health Rep* 73(2): 121–8.
70. Davis L, Caldwell G, Lynch R, Bailey R, Chin T (1970) Hong Kong influenza: the epidemiologic features of a high school family study analyzed and compared with a similar study during the 1957 Asian influenza epidemic. *Am J Epidemiol* 92: 240–7.
71. Gani R, Hughes H, Fleming D, Griffin T, Medlock J, et al. (2005) Potential impact of antiviral drug use during influenza pandemic. *Emerg Infect Dis* 11(9).
72. Taylor M (1971) Influenza 1969–1970. *J R Coll Gen Practit* 21(17).
73. Secretaria de Salud (Accessed June 15, 2009) Estadísticas influenza.
74. Centers for Disease Control and Prevention (May 19, 2009) S-oiv case count by age strata. CDC Complete Line List.
75. Schulman J, Kilbourne E (1969) Independent variation in nature of hemagglutinin and neuraminidase antigens of influenza virus. *PNAS* 63: 326–33.
